# Supplementary material for: Self-blinding citizen science to explore psychedelic microdosing
Source: eLife. 2021 Mar 2;10:e62878. doi: 10.7554/eLife.62878 (PMC7925122; doi:10.7554/eLife.62878)
Supplement: Supplementary file 1. [file elife-62878-supp1.xlsx]

## Sheet:  sample demographics
			PL group n=78	HH group n=71	MD group n=91	All groups n=240
	Age (M±SD)		33.5±8.8	34.4±10.1	32.8±9.3	33.5±9.4
	Gender	Male	57 (73%)	47 (66%)	64 (70%)	168 (70%)
		Female	20 (26%)	23 (33%)	26 (29%)	69 (29%)
		Other	1 (1%)	1 (1%)	1 (1%)	3 (1%)
	Ethnicity	White	67 (86%)	61 (86%)	77 (85%)	205 (85%)
		Asian	5 (6%)	3 (4%)	8 (9%)	16 (7%)
		Other	5 (6%)	3 (4%)	3 (3%)	11 (4%)
		Prefer not to say	1 (1%)	4 (6%)	2 (2%)	7 (3%)
	Nationality	United States	17 (22%)	17 (24%)	22 (24%)	56 (23%)
		United Kingdom	9 (12%)	9 (13%)	18 (20%)	36 (15%)
		Canada	9 (12%)	1 (1%)	5 (5%)	15 (6%)
		Netherlands	2 (3%)	7 (10%)	6 (7%)	15 (6%)
		Germany	5 (6%)	6 (9%)	5 (5%)	16 (7%)
		Other	36 (46%)	30 (42%)	35 (39%)	101 (42%)
	Education	Left school before age 16	0 (0%)	1 (1%)	1 (1%)	2 (1%)
		Some highschool / GCSE level	1 (1%)	3 (4%)	0 (0%)	4 (2%)
		High school diploma / A-level	5 (6%)	9 (12%)	6 (7%)	20 (8%)
		Some university (or equivalent)	15 (19%)	13 (18%)	21 (23%)	49 (20%)
		Bachelor’s degree (or equivalent)	30 (38%)	19 (27%)	30 (33%)	79 (33%)
		Post-graduate degree (e.g. MA, PhD)	27 (35%)	26 (37%)	34 (37%)	87 (36%)
	Employement	Student	13 (17%)	18 (25%)	22 (24%)	53 (22%)
		Unemployed	4 (5%)	1 (1%)	4 (4%)	9 (4%)
		Part-time job	11 (14%)	14 (21%)	15 (17%)	40 (17%)
		Full-time job	49 (63%)	35 (49%)	47 (52%)	131 (55%)
		Retired	1 (1%)	2 (3%)	2 (2%)	5 (2%)
	Past diagnosis	None	47 (60%)	42 (59%)	49 (54%)	138 (57%)
		Anxiety disorder	11 (14%)	6 (9%)	10 (11%)	27 (11%)
		Major depressive disorder	5 (7%)	9 (12%)	13 (14%)	27(11%)
		ADHD	4 (5%)	3 (4%)	5 (6%)	12 (5%)
		PTSD	2 (2%)	1 (1%)	4 (4%)	7 (2%)
		Other	9 (12%)	11 (15%)	11 (12%)	31 (13%)
	Current medication	None	73 (94%)	67 (94%)	82 (91%)	222 (93%)
		Anti-depressants	3 (4%)	2 (3%)	6 (6%)	11 (4%)
		ADHD	1 (1%)	2 (3%)	3 (3%)	6 (3%)
		Other	1 (1%)	0 (0%)	0 (0%)	1 (1%)
	Demographics of the study sample, data was collected at baseline (week 0 on Figure1). For Ethnicity, Nationality, Past diagnosis and Current medication, selecting multiple response categories were allowed, age is reported as mean±SD.
