# Supplementary material for: Self-blinding citizen science to explore psychedelic microdosing
Source: eLife. 2021 Mar 2;10:e62878. doi: 10.7554/eLife.62878 (PMC7925122; doi:10.7554/eLife.62878)
Supplement: Supplementary file 2. [file elife-62878-supp2.xlsx]

## Sheet: recreational drug use
			PL group n=78	HH group n=71	MD group n=91	All groups n=240
	Tobacco smoking (cigs. / day)	0	60 (77%)	53 (74%)	77 (85%)	190 (79%)
		< 1	5 (6%)	7 (10%)	5 (5%)	17 (7%)
		2-10	13 (17%)	9 (13%)	7 (8%)	29 (12%)
		> 10	0 (0%)	2 (3%)	2 (2%)	4 (2%)
	Alcohol use (10ml / week)	0	18 (23%)	24 (34%)	29 (32%)	71 (29%)
		1-6	28 (37%)	24 (34%)	34 (36% )	86 (36%)
		7-12	19 (24%)	8 (11%)	10 (11%)	37 (15%)
		13-18	9 (11%)	9 (13%)	9 (10%)	27 (11%)
		19-24	3 (4%)	2 (3%)	5 (6%)	10 (4%)
		>25	1 (1%)	4 (5%)	4 (4%)	9 (4%)
	Cannabis smoking (frequency)	Never	23 (30%)	26 (36%)	30 (33%)	79 (33%)
		Monthly or less	20 (25%)	15 (21%)	14 (15%)	49 (20%)
		2-4 times a month	18 (23%)	11 (16%)	22 (24%)	51 (22%)
		2-3 times a week	3 (4%)	4 (5%)	10 (11%)	17 (7%)
		4+ times a week	14 (18%)	15 (21%)	15 (17%)	44 (18%)
	Lifetime prelevance	None below	2 (2%)	2 (3%)	3 (3%)	7 (2%)
		MDMA / Ecstasy	22 (28%)	17 (24%)	26 (29%)	65 (27%)
		Cocaine	16 (21%)	16 (22%)	19 (21%)	51 (21%)
		Amphetamines	12 (16%)	12 (17%)	13 (14%)	37 (16%)
		Ketamine	11 (14%)	9 (13%)	12 (13%)	32 (13%)
		Benzodiazepines	8 (10%)	9 (13%)	10 (11%)	27 (11%)
		Opiates	7 (9%)	6 (8%)	8 (9%)	21 (9%)
	Psychedelices tried	Psilocybin / m. mush.	20 (25%)	19 (27%)	28 (31%)	67 (28%)
		LSD	20 (25%)	18 (26%)	25 (28%)	63 (26%)
		DMT	10 (13%)	8 (11%)	8 (9%)	26 (11%)
		Salvia Divinorum	8 (10%)	9 (12%)	10 (11%)	27 (11%)
		Hallucinogen NPS	8 (10%)	7 (10%)	10 (11%)	25 (10%)
		Ayahuasca	7 (9%)	5 (7%)	5 (5%)	17 (7%)
		Mescaline / cactus	5 (7%)	5 (7%)	5 (5%)	15 (6%)
	Number of lifetime macrodse experiences	Only once	4 (5%)	4 (5%)	1 (1%)	9 (4%)
		2-5 times	14 (18%)	14 (20%)	18 (20%)	46 (20%)
		6-10 times	13 (17%)	14 (20%)	21 (23%)	48 (20%)
		11-20 times	16 (21%)	11 (15%)	25 (27%)	52 (21%)
		21-50 times	19 (24%)	21 (30%)	15 (17%)	55 (23%)
		> 50 times	12 (15%)	7(10%)	11 (12%)	30 (13%)
	Recreational drug use of the sample, data collected at baseline (week 0 on Figure1).
