# Supplementary material for: Self-blinding citizen science to explore psychedelic microdosing
Source: eLife. 2021 Mar 2;10:e62878. doi: 10.7554/eLife.62878 (PMC7925122; doi:10.7554/eLife.62878)
Supplement: Supplementary file 3. [file elife-62878-supp3.xlsx]

## Sheet: group baseline comparisons
	Dem.	Age	F(2, 237)=0.84, p=.43
		Gender	Χ2 (2, N=240)=0.93, p=.63
		Education	Χ2(15, N=240)=11.2 , p=.70
		Employment	Χ2(12, N=240)=4.64 , p=.97
	Drug use	Tobacco use	Χ2(9, N=240)=9.56, p=.39
		Alcohol use	Χ2(18, N=240)=15.1, p=.65
		Cannabis use	Χ2 (12, N=240)=6.5, p=.89
		Lifetime psy. use	Χ2(18, N=240)=8.9, p=.88
	Baseline scores	RPWB	F(2, 237)=0.25, p=.78
		CAMS	F(2, 237)=0.28, p=.76
		SWL	F(2, 237)=1.25, p=.29
		GPTS	F(2, 237)=0.14, p=.86
		CPS	F(2, 237)=1.15, p=.32
		SSS	F(2, 237)=1.03, p=.36
	Statistical comparison of demographics, recreational drug use and baseline variables between groups.
