# Supplementary material for: Self-blinding citizen science to explore psychedelic microdosing
Source: eLife. 2021 Mar 2;10:e62878. doi: 10.7554/eLife.62878 (PMC7925122; doi:10.7554/eLife.62878)
Supplement: Supplementary file 4. [file elife-62878-supp4.xlsx]

## Sheet: unadjusted accum. scores
	Test	Baseline scores (M±SD)				Post-regime scores (M±SD)				4 w. follow-up scores (M±SD)
		PL group	HH group	MD group		PL group	HH group	MD group		PL group	HH group	MD group
	Well-being (RPWB)	192.1±24.1	188.9±25.0	190.7±28.2		195.7±22.8	192.0±27.4	196.7±25.7		194.5±28.0	195.0±27.0	194.6±26.8
	RPWB - positive relations	38.7±7.6	37.7±7.2	39.1±6.8		39.2±7.0	38.2±7.5	40.1±6.5		38.3±8.5	39.4±7.2	39.4±6.2
	RPWB - personal growth	43.8±4.1	43.0±4.1	42.9±5.2		44.0±3.7	43.4±3.7	43.6±4.6		43.3±5.0	44.1±3.6	43.2±4.7
	RPWB - autonomy	35.8±6.3	35.7±7.0	36.7±7.2		37.0±6.5	36.3±7.9	37.7±6.9		38.2±5.4	37.3±7.1	36.9±6.4
	RPWB - enviromental mas.	33.0±6.2	32.6±6.0	32.9±6.6		33.5±5.3	32.7±6.3	33.7±5.9		33.7±6.4	33.0±6.5	33.6±6.6
	RPWB - purpose in life	36.7±6.3	35.8±6.9	36.0±7.6		37.4±6.4	36.8±6.4	37.1±6.7		36.5±6.5	36.8±6.8	37.0±6.8
	RPWB - self-acceptence	36.1±8.2	35.6±8.3	34.9±9.3		37.1±8.2	36.5±8.7	37.4±8.6		36.9±8.7	36.9±9.0	37.0±8.9
	Mindfullness (CAMS)	32.6±5.8	32.8±5.4	32.1±6.3		34.8±5.2	34.0±5.5	34.9±6.5		34.0±5.9	34.9±5.8	34.3±6.7
	Life Satisfaction (SWL)	25.3±6.0	23.4±6.8	23.9±7.6		26.1±6.2	23.7±7.8	25.9±7.1		25.5±7.5	23.7±7.7	25.0±7.5
	Paranoia (GPTS)	30.7±10.5	31.4±9.5	31.6±12.2		26.9±9.4	26.2±8.5	25.0±8.2		24.5±8.8	23.8±7.7	25.5±9.1
	Cognition (CPS)	0.0±0.43	-0.11±0.54	0.02±0.6		0.0±0.55	-0.28±0.51	0.07±0.59		0.0±0.51	-0.14±0.53	0.03±0.71
	CPS - rotations	0.0±0.7	-0.16±0.98	-0.1±0.93		0.0±1.02	0.02±1.07	0.22±0.97		-0.0±0.85	-0.19±0.9	0.36±0.92
	CPS - odd one out	-0.0±0.94	-0.07±1.0	-0.21±0.97		-0.0±1.43	0.03±1.09	0.22±0.74		-0.0±0.97	0.16±0.81	0.01±0.9
	CPS - spatial planning	-0.0±0.63	-0.04±0.61	0.03±0.78		-0.0±0.93	-0.33±0.93	-0.08±0.94		0.0±1.08	-0.17±1.08	-0.19±0.98
	CPS - spatial span	0.0±0.96	-0.22±1.0	0.03±1.14		0.0±0.84	-0.57±1.31	0.13±1.06		0.0±0.83	-0.34±0.87	-0.12±1.19
	CPS - feature match	-0.0±0.84	-0.19±0.87	0.19±0.99		0.0±0.84	-0.3±0.76	-0.24±0.81		0.0±0.93	-0.33±0.92	-0.02±1.35
	CPS - paired ass.	0.0±0.91	-0.06±1.05	0.12±1.02		0.0±1.22	-0.54±0.84	0.11±1.05		-0.0±0.85	-0.08±1.01	0.13±1.06
	Personality (B5) - intellect	39.5±5.4	39.5±5.9	40.5±5.1		39.9±4.9	39.2±6.2	40.9±5.6		40.7±5.6	39.5±6.0	41.0±5.0
	Personality (B5) - openness	39.9±5.7	39.2±5.5	40.7±4.8		40.8±5.3	39.9±5.6	41.7±4.4		40.7±4.7	39.4±5.6	40.6±5.0
	Personality (B5) - neuroticism	22.1±6.4	22.8±6.6	23.1±7.4		20.9±5.9	22.0±6.6	21.4±6.6		21.5±6.6	21.6±6.2	21.6±6.5
	Personality (B5) - extraversion	25.8±6.4	25.6±5.9	26.1±6.9		26.0±6.2	26.1±6.0	26.6±6.3		26.3±6.5	26.3±5.5	26.8±6.4
	Personality (B5) - agreeableness	34.4±5.4	33.2±4.9	33.6±5.5		34.5±5.6	33.3±5.3	34.4±5.3		34.0±5.0	34.3±5.1	33.6±5.4
	Personality (B5) - consci.	31.2±6.1	30.5±6.0	30.1±6.2		31.8±6.3	30.5±5.8	31.9±5.7		31.7±6.3	31.3±6.3	31.3±6.2
	Distribution of the observed, unadjusted scores of accumulative measures. Each cell shows the M±SD of the scores for a given group at a given timepoint. Individual subscales are shown when they exist (in the Test column, ‘X – y’ denotes that y is a subscale of X).
