# Supplementary material for: Self-blinding citizen science to explore psychedelic microdosing
Source: eLife. 2021 Mar 2;10:e62878. doi: 10.7554/eLife.62878 (PMC7925122; doi:10.7554/eLife.62878)
Supplement: Supplementary file 5. [file elife-62878-supp5.xlsx]

## Sheet: adj. accum. differences
	Test	Adjusted mean estimate (over time, within-group comparisons)								Est. treatment diff. (between-group comparisons)
		From baseline to post-regime				From baseline to 4w follow-up				Post-regime			4 weeks follow-up
		PL	HH	MD		PL	HH	MD		PL vs. HH	PL vs. MD		PL vs.HH	PL vs. MD
	Well-being (RPWB)	1.6±4.0	2.8±4.3	4.2±3.9*		1.4±4.3	4.8±4.7*	2.0±4.1		1.2±5.9	2.5±5.6		3.4±6.4	0.6±4.9
	RPWB - positive relations	-1.4±1.6	-1.7±1.6*	-1.2±1.6		-2.0±1.6*	-0.8±1.6	-1.7±1.6*		-0.3±1.3	0.2±1.3		1.2±1.5	0.3±1.4
	RPWB - personal growth	0.0±0.7	0.2±0.8	0.1±0.7		-0.4±0.8	0.5±0.9	-0.3±0.7		0.1±1.1	0.0±1.0		0.8±1.2	0.1±1.1
	RPWB - autonomy	0.6±1.1	0.4±1.1	0.6±1.0		1.6±1.1**	1.0±1.2	0.3±1.1		-0.2±1.5	0.0±1.5		-0.5±1.7	-1.3±1.6
	RPWB - enviromental mas.	0.0±0.8	0.0±0.9	0.5±0.8		0.3±0.9	0.1±1.0	0.3±0.9		0.0±1.2	0.5±1.2		-0.2±1.4	0.1±1.3
	RPWB - purpose in life	0.4±0.9	0.7±1.0	0.9±0.9		-0.1±1.0	0.8±1.1	0.3±0.9		0.4±1.4	0.5±1.3		0.9±1.6	0.4±1.4
	RPWB - self-acceptence	0.6±1.2	0.9±1.2	1.6±1.1**		0.5±1.3	1.2±1.4	1.4±1.2*		0.3±1.7	1.0±1.6		0.7±1.9	0.9±1.7
	Mindfullness (CAMS)	1.6±1.1**	1.3±1.2*	2.4±1.1***		1.5±1.2**	1.9±1.3**	2.0±1.1***		-0.3±1.6	0.8±1.5		0.4±1.7	0.5±1.6
	Life Satisfaction (SWL)	0.8±1.2	0.1±1.3	1.2±1.2*		0.6±1.3	0.0±1.4	1.0±1.2		-0.7±1.6	0.4±1.7		-0.6±1.9	0.5±1.7
	Paranoia (GPTS)	-3.4±1.7***	-4.9±1.9***	-5.0±1.7***		-5.7±1.9***	-7.5±2.1***	-5±1.8***		-1.4±2.5	-1.6±2.5		-1.9±2.8	0.6±2.6
	Cognition (CPS)	-0.07±0.14	-0.16±0.14*	0.10±0.13		-0.02±0.16	-0.1±0.14	0.06±0.16		-0.09±0.20	0.17±0.19		-0.08±0.21	0.08±0.23
	CPS - rotations	-0.03±0.29	0.07±0.3	0.34±0.28*		-0.01±0.34	-0.09±0.30	0.45±0.33**		0.10±0.42	0.37±0.40		-0.09±0.45	0.46±0.48
	CPS - odd one out	0.12±0.33	0.32±0.33	0.52±0.31**		0.16±0.38	0.38±0.33*	0.35±0.38		0.20±0.46	0.40±0.45		0.23±0.50	0.19±0.55
	CPS - spatial planning	-0.14±0.28	-0.22±0.28	-0.13±0.26		-0.05±0.32	-0.15±0.28	-0.24±0.31		-0.08±0.40	0.01±0.39		-0.10±0.43	-0.19±0.45
	CPS - spatial span	-0.07±0.3	-0.49±0.3**	0.10±0.28		-0.11±0.35	-0.26±0.30	-0.06±0.34		-0.42±0.43	0.17±0.40		-0.15±0.46	0.05±0.48
	CPS - feature match	0.36±0.45	0.31±0.45	0.18±0.44		0.45±0.46	0.16±0.43	0.32±0.45		-0.05±0.42	-0.18±0.39		-0.29±0.45	-0.13±0.37
	CPS - paired ass.	0.04±0.3	-0.51±0.3**	0.09±0.28		0.0±0.35	-0.10±0.30	0.06±0.33		-0.55±0.43*	0.05±0.41		-0.11±0.45	0.06±0.48
	Personality (B5) - intellect	0.0±0.8	-0.4±0.9	-0.1±0.8		0.3±0.9	-0.2±1.0	0.2±0.9		-0.4±1.2	-0.2±1.2		-0.5±1.4	-0.1±1.3
	Personality (B5) - openness	0.6±0.8	0.4±0.9	0.9±0.8*		0.8±0.9	-0.1±1.0	0.4±0.8		-0.2±1.2	0.3±1.2		-0.9±1.3	-0.4±1.2
	Personality (B5) - neuroticism	-1.0±1.0*	-0.6±1.0	-1.3±0.9**		-0.6±1	-1.1±1.1	-1.0±1.0*		0.4±1.4	-0.3±1.4		-0.4±1.5	-0.3±1.3
	Personality (B5) - extraversion	0.3±0.9	0.5±1.0	0.1±0.9		0.3±1	0.7±1.0	0.2±0.9		0.3±1.4	-0.2±1.2		0.4±1.4	-0.1±1.3
	Personality (B5) - agree.	0.2±0.8	-0.2±0.8	0.7±0.8		0.3±0.9	0.7±0.9	0.2±0.8		-0.4±1.2	0.5±1.1		0.4±1.3	-0.1±1.1
	Personality (B5) - consci.	-1.3±1.5	-1.5±1.5	-0.5±1.5		-1.4±1.5	-0.9±1.5	-0.6±1.5		-0.2±1.3	0.8±1.3		0.6±1.4	0.9±1.3
	Adjusted mean difference estimates of accumulative outcomes. Results are shown for the models discussed in the Accumulative outcomes section (i.e. models without the number of MD guess adjustment). The first six columns show change from baseline to the post-regime (week 5) / 4-weeks follow up timepoints in each group (i.e. change over time), each cell shows the adjusted mean estimate±95% CI and s…
