# Supplementary material for: Self-blinding citizen science to explore psychedelic microdosing
Source: eLife. 2021 Mar 2;10:e62878. doi: 10.7554/eLife.62878 (PMC7925122; doi:10.7554/eLife.62878)
Supplement: Supplementary file 6. [file elife-62878-supp6.xlsx]

## Sheet: accum. model parameters
	Outcome	Group	Timepoint	Estimate	95% CI	StdErr	t-value	p(t)
	Well-being (RPWB)
	Intercept			38.3164	[21.9 , 54.8]	8.3434	4.59	<.0001 ***
	group	HH		3.372	[-3.0 , 9.8]	3.2475	1.04	0.3004
	group	MD		0.6059	[-5.3 , 6.5]	3.0082	0.2	0.8406
	timepoint		post-regime	0.2234	[-4.2 , 4.6]	2.2211	0.1	0.92
	group*timepoint	HH	post-regime	-2.2078	[-8.6 , 4.2]	3.2457	-0.68	0.4975
	group*timepoint	MD	post-regime	1.9262	[-4.2 , 8.1]	3.1113	0.62	0.5369
	baseline			-0.183	[-0.3 , -0.1]	0.04156	-4.4	<.0001 ***
	n_micro_months			-1.0253	[-1.7 , -0.3]	0.3431	-2.99	<.0001 ***
	Mindfullnes (CAMS)
	Intercept			9.7029	[6.0 , 13.4]	1.8551	5.23	<.0001
	group	HH		0.4063	[-1.3 , 2.1]	0.8731	0.47	0.6422
	group	MD		0.5357	[-1.1 , 2.1]	0.8113	0.66	0.5098
	timepoint		post-regime	0.1689	[-1.0 , 1.3]	0.5937	0.28	0.7764
	group*timepoint	HH	post-regime	-0.7033	[-2.4 , 1.0]	0.8675	-0.81	0.4189
	group*timepoint	MD	post-regime	0.2275	[-1.4 , 1.9]	0.8326	0.27	0.7851
	baseline			-0.3222	[-0.4 , -0.2]	0.04916	-6.55	<.0001
	expectation			0.03328	[0.0 , 0.1]	0.01497	2.22	0.03 *
	Life Satisfaction (SWL)
	Intercept			6.4749	[3.68 , 9.27]	1.4178	4.57	<.0001 ***
	group	HH		-0.5662	[-2.47 , 1.34]	0.9659	-0.59	0.5584
	group	MD		0.4453	[-1.32 , 2.21]	0.8949	0.5	0.6193
	timepoint		post-regime	0.2136	[-0.99 , 1.42]	0.6091	0.35	0.7263
	group*timepoint	HH	post-regime	-0.1714	[-1.93 , 1.59]	0.8895	-0.19	0.8475
	group*timepoint	MD	post-regime	-0.01535	[-1.71 , 1.68]	0.8591	-0.02	0.9858
	baseline			-0.2267	[-0.32 , -0.13]	0.04802	-4.72	<.0001 ***
	psychiatric_past			-0.7363	[-1.38 , -0.10]	0.3248	-2.27	0.02 *
	Paranoia (GPTS)
	Intercept			10.3363	[7.24 , 13.44]	1.5713	6.58	<.0001 ***
	group	HH		-1.8766	[-4.67 , 0.91]	1.4146	-1.33	0.1862
	group	MD		0.6135	[-1.98 , 3.21]	1.3148	0.47	0.6413
	timepoint		post-regime	2.2281	[0.29 , 4.16]	0.9785	2.28	0.02 *
	group*timepoint	HH	post-regime	0.4393	[-2.39 , 3.27]	1.4306	0.31	0.7593
	group*timepoint	MD	post-regime	-2.1631	[-4.89 , 0.56]	1.377	-1.57	0.1185
	baseline			-0.521	[-0.60 , -0.44]	0.04138	-12.59	<.0001 ***
	Cognition (CPS)
	Intercept			0.7477	[0.46 , 1.04]	0.1464	5.11	<.0001 ***
	group	HH		-0.08014	[-0.29 , 0.13]	0.1071	-0.75	0.4556
	group	MD		0.08008	[-0.14 , 0.30]	0.113	0.71	0.4797
	timepoint		post-regime	-0.05363	[-0.24 , 0.13]	0.09384	-0.57	0.5695
	group*timepoint	HH	post-regime	-0.00844	[-0.26 , 0.25]	0.1279	-0.07	0.9475
	group*timepoint	MD	post-regime	0.09316	[-0.17 , 0.36]	0.1315	0.71	0.481
	baseline			-0.4733	[-0.61 , -0.34]	0.06687	-7.08	<.0001 ***
	age			-0.02118	[-0.03 , -0.01]	0.003537	-5.99	<.0001 ***
	n_micro_months			-0.02963	[-0.05 , -0.01]	0.0109	-2.72	0.01 *
	Model parameters of the accumulative outcomes, see main text for details on model construction. Results are shown for the models discussed in the Accumulative outcomes section (i.e. models without the number of MD guesses adjustment). Group estimates (HH/MD groups) encode estimated change relative to the PL group. Covariates: n_micro_months is the number of lifetime months microdosed previously; …
