# Supplementary material for: Self-blinding citizen science to explore psychedelic microdosing
Source: eLife. 2021 Mar 2;10:e62878. doi: 10.7554/eLife.62878 (PMC7925122; doi:10.7554/eLife.62878)
Supplement: Supplementary file 7. [file elife-62878-supp7.xlsx]

## Sheet: acute model parameters
	Outcome	Condition	Estimate	Std. error	DF	t-value	p(t)
	Acute emotional state (PANAS)
	Intercept		10.2118	1.78237	239	5.729	<.001***
	condition	MD	-2.21932	0.71644	611	-3.098	<.01**
	expectation		0.10775	0.02417	611	4.459	<.001***
	psychiatric_past		-2.51444	0.46487	611	-5.409	<.001***
	Acute cog. performance (CPS)
	Intercept		0.621522	0.128578	220	4.834	<.001***
	condition	MD	0.045812	0.035174	453	-1.302	0.19
	age		-0.023301	0.003329	453	-6.998	<.001***
	sex	female	-0.16	0.066036	453	2.474	<.05*
	Acute intensity VAS
	Intercept		12.7689	3.22819	240	3.955	<.001***
	condition	MD	-12.4947	1.5376	606	-8.126	<.001***
	expectation		0.12333	0.04302	606	2.867	<.01**
	Acute mood VAS
	Intercept		53.4989	3.32043	237	16.112	<.001***
	condition	MD	4.54932	1.45129	610	-3.135	<.01**
	expectation		0.19919	0.04465	610	4.461	<.001***
	psychiatric_past		-3.82397	0.85622	610	-4.466	<.001***
	Acute energy VAS
	Intercept		46.6946	3.77083	237	12.383	<.001***
	condition	MD	5.27465	1.41077	609	-3.739	<.001***
	expectation		0.17374	0.04422	609	3.929	<.001***
	psychiatric_past		-2.33203	0.84782	609	-2.751	<.01**
	sex	female	4.86944	1.87182	609	2.601	<.01**
	Acute creativity VAS
	Intercept		50.6639	3.01282	237	16.816	<.001***
	condition	MD	4.66389	1.33489	610	-3.494	<.01**
	expectation		0.13581	0.04045	610	3.357	<.01**
	psychiatric_past		-3.1299	0.7753	610	-4.037	0.04*
	Acute focus VAS
	Intercept		48.0349	3.21879	237	14.923	<.001***
	condition	MD	1.34396	1.39694	610	-0.962	0.2557
	expectation		0.17579	0.04332	610	4.058	<.001***
	psychiatric_past		-2.76715	0.83088	610	-3.33	<.01**
	Acute temper VAS
	Intercept		43.4682	3.94557	237	11.017	<.001***
	condition	MD	1.25784	1.62935	610	0.772	0.4003
	expectation		-0.13659	0.05336	610	-2.56	<.05*
	psychiatric_past		2.26383	1.02553	610	2.207	<.05*
	Post-acute well-being (WEMWB)
	Intercept		44.9618	1.61947	238	27.763	<.001***
	condition	MD	0.91828	0.53245	629	-1.725	0.08
	expectation		0.09255	0.02259	629	4.098	<.001***
	psychiatric_past		-2.35576	0.43542	629	-5.41	<.001***
	Post-acute depression (QIDS)
	Intercept		1.81063	0.9588	236	1.888	<.05*
	condition	MD	0.33919	0.29112	624	1.165	0.249
	psychiatric_past		1.89793	0.2152	624	8.82	<.001***
	sss		0.0647	0.02245	624	2.882	<.01**
	Post-acute anxiety (STAIT)
	Intercept		26.9635	2.75007	236	9.805	<.001***
	condition	MD	-1.46155	0.66247	620	2.206	0.03*
	psychiatric_past		4.40146	0.61967	620	7.103	<.001***
	sss		0.20697	0.06451	620	3.208	<.01**
	Post-acute connectedness (SCS)
	Intercept		33.2159	0.4739	242	70.097	<.001***
	condition	MD	0.1083	0.3959	639	-0.274	0.7016
	psychiatric_past		-2.1783	0.3872	639	-5.626	<.001***
	Acute / post-acute model parameters, see main text for details on model construction. The condition (MD) estimate encodes the change relative to the PL condition. Covariate variable name mean the following: n_micro_months is the number of lifetime months microdosed previously; psychiatric_past is the number of lifetime psychiatric diagnosis; exception is the expectation score as described in Appe…
