# Supplementary material for: Self-blinding citizen science to explore psychedelic microdosing
Source: eLife. 2021 Mar 2;10:e62878. doi: 10.7554/eLife.62878 (PMC7925122; doi:10.7554/eLife.62878)
Supplement: Supplementary file 8. [file elife-62878-supp8.xlsx]

## Sheet: adj strata compariosons
	Test	PL/PL vs. MD/PL	PL/MD vs. MD/MD	PL/PL vs. PL/MD	MD/PL vs. MD/MD
	Acute outcomes
	Emotional state (PANAS)	1±1.7	0.9±2.2	5.5±1.9***	5.4±2***
	PANAS - positive	0.8±1.2	0.8±1.6	5±1.3***	5±1.4***
	PANAS - negative	-0.3±0.9	-0.2±1.2	-0.6±1	-0.4±1
	Daily effects VAS - intensity	1.1±2.4	7.3±3.1***	33.7±2.7***	39.8±2.8***
	Daily effects VAS - energy	0.9±3.4	5.1±4.4*	10±3.7***	14.1±3.9***
	Daily effects VAS - mood	0.3±3.5	3.6±4.5	11.3±3.8***	14.6±4***
	Daily effects VAS - creativity	1.7±4.2	1.9±3.2	11.7±3.7***	11.9±3.5***
	Daily effects VAS - focus	-0.4±3.4	-1±4.4	8.7±3.8***	8.1±4***
	Daily effects VAS - temper	-0.3±4.1	0.8±5.2	-6.1±4.4*	-5±4.7*
	Cognition (CPS)	0.01±0.09	0.09±0.11	-0.01±0.09	0.07±0.1
	CPS - rotations	0.09±0.18	0.18±0.23	-0.09±0.19	0±0.2
	CPS - odd one out	0.07±0.2	0.11±0.26	-0.01±0.22	0.03±0.23
	CPS - spatial planning	0.04±0.17	0±0.21	0.1±0.18	0.06±0.19
	CPS - spatial span	-0.11±0.17	0.16±0.22	-0.08±0.19	0.19±0.2
	CPS - feature match	-0.06±0.19	-0.09±0.24	0.09±0.2	0.06±0.21
	CPS - paired associates	0.02±0.19	0.11±0.24	-0.06±0.2	0.04±0.21
	Post-acute outcomes
	Mental Well-being (WEMWB)	0.3±1.3	-0.1±1.3	3.2±1.1***	2.8±1***
	Depression (QIDS)	0±0.7	-0.3±0.7	-0.6±0.6	-0.9±0.6**
	Anxiety trait (STAIT)	-1±1.6	-0.5±1.6	-2.9±1.4***	-2.4±1.3***
	Social Connectedness (SCS)	-0.3±1	-0.3±1	1.4±0.8***	1.4±0.8***
	Comparisons between the 2*2=4 strata formed by the combination of condition (PL/MD) and guess (PL/MD). Each cell shows the adjusted estimated difference±95% CI; stars mark the significance (*p<.05; **p<.01; ***p<.001). P-values and estimates were derived from the mixed effect models with the guess component, see Methods for details. Individual subscales are shown when they exist (in the Test colu…
